# Supplementary material for: Heterometallic Ag2Ti10 and Ag4Ti8-oxo clusters with different silver doping models: synthesis, structure, and theoretical studies
Source: Royal Society of Chemistry journal article supplement (doi:10.1039/d0dt02396e), 2020-01-01
Supplement: d0dt02396e1.pdf [file d0dt02396e1.pdf]

Electronic Supplementary Material (ESI) for Dalton Transactions  
This journal is © The Royal Society of Chemistry 2020

**Supporting Information for:**

## **Heterometallic Ag<sub>2</sub>Ti<sub>10</sub> and Ag<sub>4</sub>Ti<sub>8</sub>-oxo clusters with different silver doping models: synthesis, structure, and theoretical studies**

**Simin Hou,<sup>a,b</sup> Qiaohong Li,<sup>\*a</sup> Qing-Rong Ding,<sup>a</sup> Yao Kang,<sup>a</sup> Jian Zhang<sup>a</sup> and Lei Zhang<sup>\*a</sup>**

- a. State Key Laboratory of Structural Chemistry, Fujian Institute of Research on the Structure of Matter, Chinese Academy of Sciences, Fuzhou, Fujian 350002, China.*
- b. College of Chemistry, Fuzhou University, Fuzhou, Fujian 350116, P. R. China.*

Corresponding Author

E-mail: [lqh2382@fjirsm.ac.cn](mailto:lqh2382@fjirsm.ac.cn); [LZhang@fjirsm.ac.cn](mailto:LZhang@fjirsm.ac.cn)

**Table S1.** Crystallographic data and structure refinement details for **PTC-221** and **PTC-222**.

| Compounds                                   | PTC-221                                                                           | PTC-222                                                                                         |
|---------------------------------------------|-----------------------------------------------------------------------------------|-------------------------------------------------------------------------------------------------|
| Empirical formula                           | C <sub>132</sub> H <sub>86</sub> Ag <sub>2</sub> O <sub>58</sub> Ti <sub>10</sub> | C <sub>74</sub> H <sub>132</sub> Ag <sub>4</sub> N <sub>2</sub> O <sub>39</sub> Ti <sub>8</sub> |
| Formula weight                              | 3294.74                                                                           | 2488.26                                                                                         |
| Temperature/K                               | 100.0(2)                                                                          | 100.00(2)                                                                                       |
| Crystal system                              | monoclinic                                                                        | monoclinic                                                                                      |
| Space group                                 | P2 <sub>1</sub> /n                                                                | C2/c                                                                                            |
| a/Å                                         | 15.4863(2)                                                                        | 15.5445(3)                                                                                      |
| b/Å                                         | 45.3078(6)                                                                        | 27.2039(6)                                                                                      |
| c/Å                                         | 19.2032(3)                                                                        | 25.2746(6)                                                                                      |
| α/°                                         | 90                                                                                | 90                                                                                              |
| β/°                                         | 103.069(2)                                                                        | 100.439(2)                                                                                      |
| γ/°                                         | 90                                                                                | 90                                                                                              |
| Volume/Å <sup>3</sup>                       | 13124.9(3)                                                                        | 10511.0(4)                                                                                      |
| Z                                           | 4                                                                                 | 4                                                                                               |
| ρ <sub>calc</sub> /cm <sup>3</sup>          | 1.667                                                                             | 1.537                                                                                           |
| μ/mm <sup>-1</sup>                          | 8.075                                                                             | 11.362                                                                                          |
| F(000)                                      | 6624.0                                                                            | 4936.0                                                                                          |
| Radiation                                   | CuKα (λ = 1.54184)                                                                | CuKα (λ = 1.54184)                                                                              |
| Index ranges                                | -18 ≤ h ≤ 7, -55 ≤ k ≤ 44, -23 ≤ l ≤ 22                                           | -12 ≤ h ≤ 18, -30 ≤ k ≤ 32, -30 ≤ l ≤ 29                                                        |
| Reflections collected                       | 51803                                                                             | 18708                                                                                           |
| Independent reflections                     | 24602 [R <sub>int</sub> = 0.0647, R <sub>sigma</sub> = 0.0806]                    | 9525 [R <sub>int</sub> = 0.0383, R <sub>sigma</sub> = 0.0516]                                   |
| Data/restraints/parameters                  | 24602/784/1839                                                                    | 9525/0/565                                                                                      |
| Goodness-of-fit on F <sup>2</sup>           | 1.052                                                                             | 1.037                                                                                           |
| Final R indexes [I>=2σ (I)]                 | R <sub>1</sub> = 0.0899, wR <sub>2</sub> = 0.2289                                 | R <sub>1</sub> = 0.0617, wR <sub>2</sub> = 0.1625                                               |
| Final R indexes [all data]                  | R <sub>1</sub> = 0.1214, wR <sub>2</sub> = 0.2544                                 | R <sub>1</sub> = 0.0850, wR <sub>2</sub> = 0.1823                                               |
| Largest diff. peak/hole / e Å <sup>-3</sup> | 2.20/-1.54                                                                        | 1.77/-0.93                                                                                      |

**Table S2** Bond valence sum (BVS) analysis of metal ions <sup>[1]</sup> in **PTC-221** and **PTC-222**.

| PTC-221                                                                                                                                                                                                                     |                                                                                                                                                                                                                             |
|-----------------------------------------------------------------------------------------------------------------------------------------------------------------------------------------------------------------------------|-----------------------------------------------------------------------------------------------------------------------------------------------------------------------------------------------------------------------------|
| Ag1 1.266<br>Ag1-O00G 0.309 d=2.276(5)<br>Ag1A-O00G 0.309 d=2.277(5)<br>Ag1-O00T 0.182 d=2.473(5)<br>Ag1-O00W 0.267 d=2.330(5)<br>Ag1A-O00W 0.199 d=2.440(5)<br>Ag1 parameter: r1 = 1.842                                   | Ag2 1.557<br>Ag2-O00J 0.326 d=2.257(5)<br>Ag2A-O00J 0.318 d=2.266(10)<br>Ag2-O01L 0.195 d=2.446(7)<br>Ag2A-O01L 0.562 d=2.055(12)<br>Ag2-O01D 0.155 d=2.531(6)<br>Ag1 parameter: r1 = 1.842                                 |
| Ti03 4.225<br>Ti03-O00E 0.576 d=2.019(5)<br>Ti03-O00F 0.645 d=1.977(4)<br>Ti03-O00G 0.869 d=1.867(5)<br>Ti03-O00I 0.611 d=1.997(5)<br>Ti03-O00J 0.930 d=1.842(5)<br>Ti03-O00K 0.594 d=2.008(5)<br>Ti4 parameter: r1 = 1.815 | Ti04 4.157<br>Ti04-O00G 0.971 d=1.826(5)<br>Ti04-O00J 0.890 d=1.858(5)<br>Ti04-O00L 0.670 d=1.963(5)<br>Ti04-O00M 0.628 d=1.987(5)<br>Ti04-O00O 0.491 d=2.078(5)<br>Ti04-O00R 0.506 d=2.067(5)<br>Ti4 parameter: r1 = 1.815 |
| Ti05 4.307<br>Ti05-O00P 0.556 d=2.032(5)<br>Ti05-O00S 0.539 d=2.044(6)<br>Ti05-O00U 0.550 d=2.036(5)<br>Ti05-O00V 0.915 d=1.848(5)<br>Ti05-O00Y 0.828 d=1.885(5)<br>Ti05-O010 0.920 d=1.846(6)<br>Ti4 parameter: r1 = 1.815 | Ti06 4.377<br>Ti06-O00Q 0.568 d=2.024(5)<br>Ti06-O00W 0.547 d=2.038(6)<br>Ti06-O013 0.995 d=1.817(6)<br>Ti06-O014 0.637 d=1.982(6)<br>Ti06-O016 0.692 d=1.951(6)<br>Ti06-O010 0.937 d=1.839(5)<br>Ti4 parameter: r1 = 1.815 |
| Ti08 4.316<br>Ti08-O00H 0.582 d=2.015(5)<br>Ti08-O012 0.968 d=1.827(6)<br>Ti08-O01F 0.618 d=1.993(5)                                                                                                                        | Ti09 4.389<br>Ti09-O00T 0.489 d=2.080(5)<br>Ti09-O017 0.595 d=2.007(6)<br>Ti09-O019 0.616 d=1.994(5)                                                                                                                        |

|                                                                                                                                                                                                                                                                    |                                                                                                                                                                                                                             |
|--------------------------------------------------------------------------------------------------------------------------------------------------------------------------------------------------------------------------------------------------------------------|-----------------------------------------------------------------------------------------------------------------------------------------------------------------------------------------------------------------------------|
| Ti08-O01I 0.674 d=1.961(6)<br>Ti08-O01L 0.539 d=2.044(7)<br>Ti08-O01Y 0.935 d=1.840(7)<br>Ti4 parameter: r1 = 1.815                                                                                                                                                | Ti09-O01E 0.867 d=1.868(6)<br>Ti09-O01M 1.170 d=1.757(6)<br>Ti09-O01N 0.652 d=1.973(6)<br>Ti4 parameter: r1 = 1.815                                                                                                         |
| Ti0A 4.339<br>Ti0A-O00Z 0.576 d=2.019(5)<br>Ti0A-O018 0.553 d=2.034(6)<br>Ti0A-O01A 0.883 d=1.861(6)<br>Ti0A-O01B 0.871 d=1.866(6)<br>Ti0A-O01G 0.539 d=2.044(6)<br>Ti0A-O01Q 0.917 d=1.847(6)<br>Ti4 parameter: r1 = 1.815                                        | Ti0B 4.345<br>Ti0B-O00N 0.521 d=2.056(6)<br>Ti0B-O015 0.540 d=2.043(6)<br>Ti0B-O01D 0.541 d=2.042(6)<br>Ti0B-O01J 0.945 d=1.836(6)<br>Ti0B-O01S 0.902 d=1.853(7)<br>Ti0B-O01V 0.895 d=1.856(7)<br>Ti4 parameter: r1 = 1.815 |
| Ti0C 4.300<br>Ti0C-O00X 0.567 d=2.025(6)<br>Ti0C-O01C 0.498 d=2.073(5)<br>Ti0C-O01H 0.530 d=2.050(6)<br>Ti0C-O01K 0.930 d=1.842(6)<br>Ti0C-O01T 0.902 d=1.853(7)<br>Ti0C-O01U 0.874 d=1.865(7)<br>Ti4 parameter: r1 = 1.815                                        | Ti0D 4.344<br>Ti0D-O011 0.476 d=2.090(6)<br>Ti0D-O01P 0.627 d=1.988(6)<br>Ti0D-O01R 0.654 d=1.972(6)<br>Ti0D-O01W 0.600 d=2.004(7)<br>Ti0D-O01X 0.885 d=1.860(7)<br>Ti0D-O021 1.102 d=1.779(7)<br>Ti4 parameter: r1 = 1.815 |
| <b>PTC-222</b>                                                                                                                                                                                                                                                     |                                                                                                                                                                                                                             |
| Ag01 1.000<br>Ag01-O008 <sup>1</sup> 0.399 d=2.182(2)<br>Ag01-O00G 0.164 d=2.511(2)<br>Ag01-O00O 0.437 d=2.148(3)<br>Ag1 parameter: r1 = 1.842                                                                                                                     | Ag02 1.065<br>Ag02-O009 0.239 d=2.371(2)<br>Ag02-O00I 0.219 d=2.404(2)<br>Ag02-O00Q 0.273 d=2.323(3)<br>Ag1 parameter: r1 = 1.842<br>Ag02-N00Z 0.334 d=2.256(4)<br>Ag1 parameter: r1 = 1.85                                 |
| Ti03 4.136<br>Ti03-O007 <sup>1</sup> 0.759 d=1.917(2)<br>Ti03-O008 0.853 d=1.874(2)<br>Ti03-O009 1.014 d=1.810(2)<br>Ti03-O00B <sup>1</sup> 0.494 d=2.076(2)<br>Ti03-O00C 0.555 d=2.033(2)<br>Ti03-O00E <sup>1</sup> 0.462 d=2.101(2)<br>Ti4 parameter: r1 = 1.815 | Ti04 4.189<br>Ti04-O008 0.864 d=1.869(2)<br>Ti04-O009 0.769 d=1.912(2)<br>Ti04-O00F 0.470 d=2.094(2)<br>Ti04-O00G 0.963 d=1.829(2)<br>Ti04-O00J 0.530 d=2.050(2)<br>Ti04-O00N 0.592 d=2.009(3)<br>Ti4 parameter: r1 = 1.815 |
| Ti05 4.161<br>Ti05-O007 0.642 d=1.979(2)<br>Ti05-O00A 0.981 d=1.8220(6)<br>Ti05-O00H 0.531 d=2.049(3)<br>Ti05-O00I 0.925 d=1.844(2)<br>Ti05-O00K 0.384 d=2.169(2)<br>Ti05-O00P 0.698 d=1.948(3)<br>Ti4 parameter: r1 = 1.815                                       | Ti06 4.212<br>Ti06-O007 0.739 d=1.927(2)<br>Ti06-O00D 0.502 d=2.070(2)<br>Ti06-O00G 0.960 d=1.830(2)<br>Ti06-O00I 0.950 d=1.834(2)<br>Ti06-O00L 0.524 d=2.054(2)<br>Ti06-O00M 0.537 d=2.045(2)<br>Ti4 parameter: r1 = 1.815 |

[1]  $V_i = \sum S_{ij} = \sum \exp[(r_1 - d)/B]$ , where  $r_1$  is the bond parameter between different atoms (eg.  $r_1 = 1.815$  for  $\text{Ti}^{\text{IV}}\text{-O}$ ),  $d$  is the bond length between atoms  $i$  and  $j$  (eg.  $d_1$  for  $\text{Ti}_1\text{-O}_1$ ,  $d_2$  for  $\text{Ti}_1\text{-O}_2$ );  $B$  is a constant, the “universal parameter”  $\sim 0.37$  Å;  $S_{ij}$  is the valence of a bond between atoms  $i$  and  $j$ ;  $V_i$  is the sum of all bond valences of the bonds formed by a given atom  $i$ .

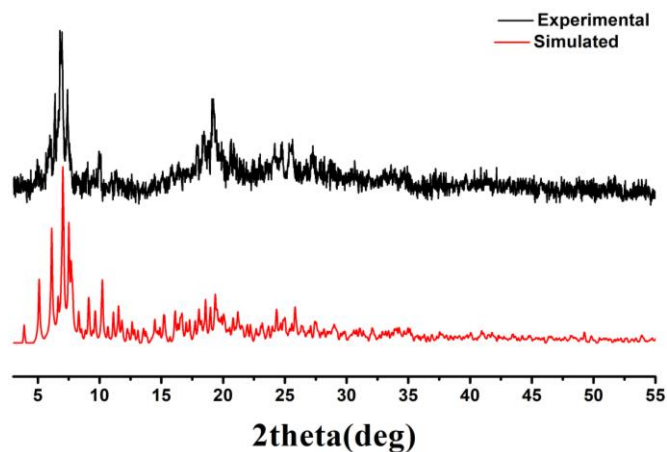

Figure S1. The simulated and experimental PXRD patterns of PTC-221.

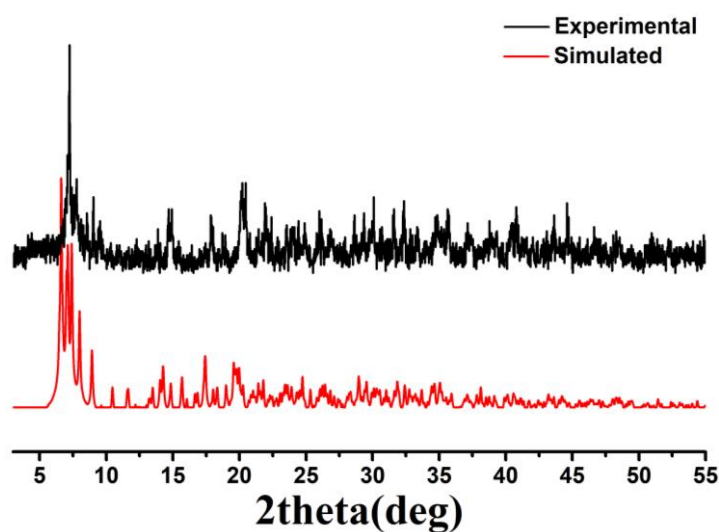

Figure S2. The simulated and experimental PXRD patterns of PTC-222.

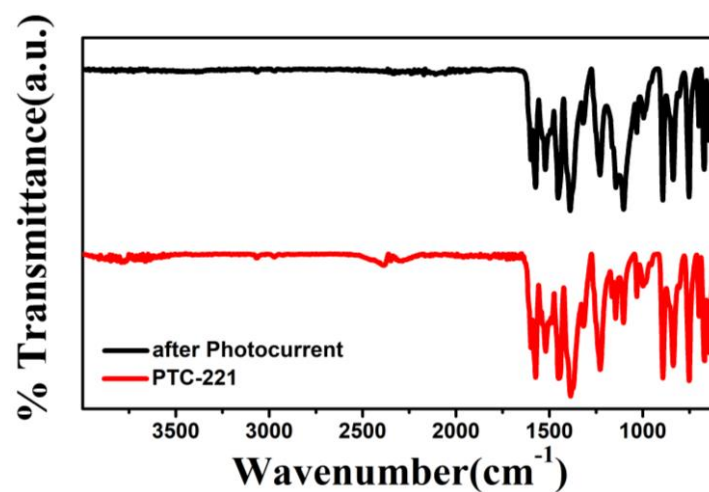

Figure S3. The IR spectra of PTC-221 and the powder samples after photocurrent test.

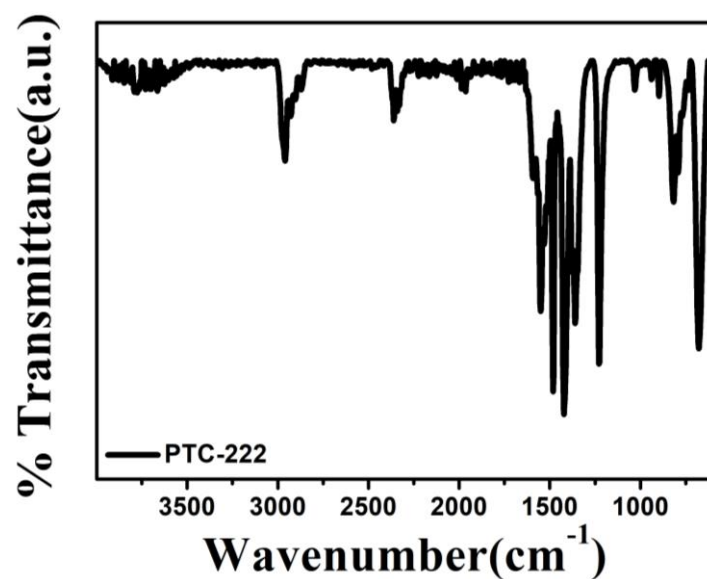

Figure S4. The IR spectrum of PTC-222.

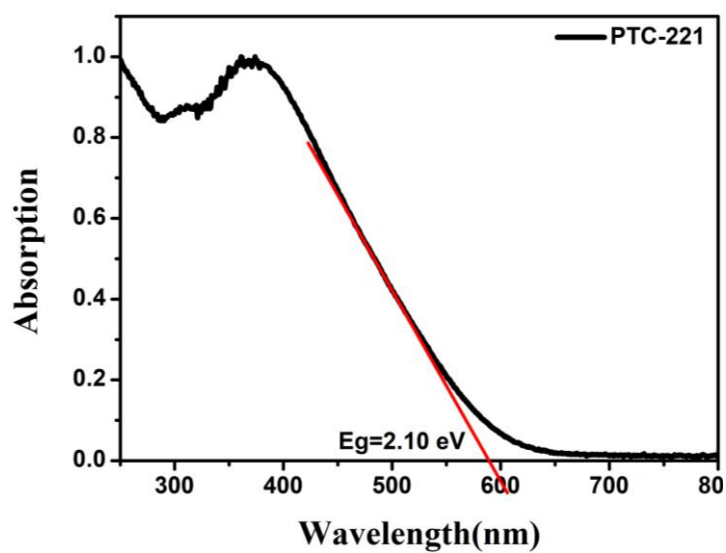

Figure S5. The solid-state UV-vis absorption spectrum of PTC-221.

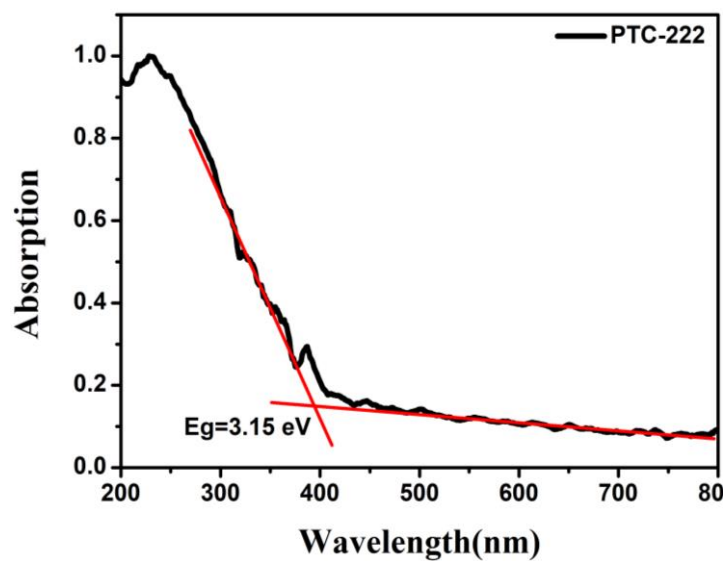

Figure S6. The solid-state UV-vis absorption spectrum of PTC-222.

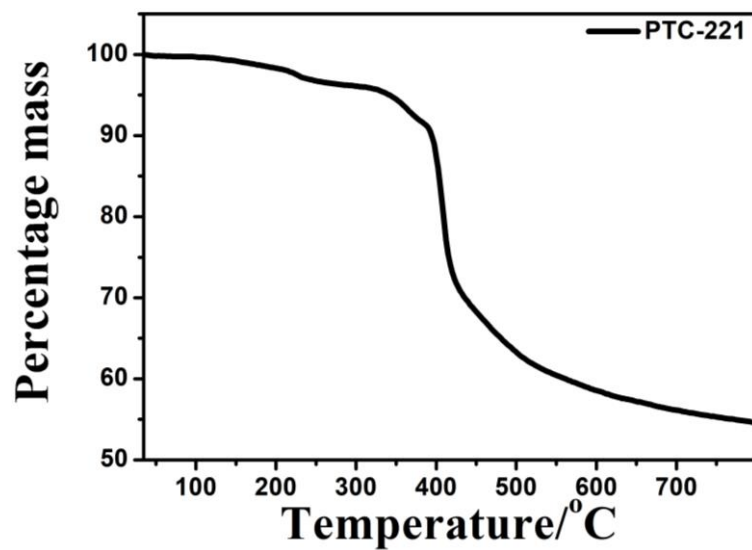

Figure S7. The TGA curve of PTC-221.
